# Supplementary material for: Micro-Textural Controls on Magma Rheology and Vulcanian Explosion Cyclicity
Source: Frontiers journal article supplement (doi:10.3389/feart.2020.611320), 2021-01-25
Supplement: Data_Sheet_1.xlsx [file Data_Sheet_1.xlsx]

## Sheet: Sheet1
Supplementary File A: Sample dimensions; porosity and permeability results
Micro-textural controls on magma rheology and vulcanian explosion cyclicity
A. A. Bain, J. E. Kendrick, A. Lamur, Y. Lavallée, E. S. Calder, J. A. Cortés, G. P. Cortés, D. Gomez Martinez, R. A Torres
Before high-temperature deformation
Sample*	Sample length (mm)	Sample diameter (mm)		Sample mass (g)	Sample bulk volume (cm3)	Sample skeletal volume (cm3)	Connected Porosity (%)	Confining pressure (MPa)	Pore pressure in (MPa)	Pore pressure out (MPa)	Delta P pore pressure (MPa)	Average pore pressure (Mpa)	Flow rate (mL/min)	Effective pressure (MPa)	Permeability (m2)
GAL4	52.48	25.86		62.51	27.566	22.6022	18.01	7.032	4.927	4.573	0.354	4.75	0.31	2.282	1.45e-15
GAL5	53.22	25.8		74.17	27.8306	27.2354	2.14	5.938	4.498	3.509	0.989	4.0035	0.01	1.9345	1.72e-17
GAL6	49.35	25.96		58.84	26.1117	21.6065	17.25	6.191	4.254	4.249	0.005	4.2515	1.09	1.9395	3.39e-13
GAL7	40.66	25.96		50.79	21.5235	18.6512	13.34	6.088	3.97	3.535	0.435	3.7525	0.31	2.3355	3.83e-16
GAL8	53.38	25.97		60.36	28.28	22.1713	21.6	6.168	4.016	3.996	0.02	4.006	2.15	2.162	1.81e-13
GAL14	47.95	25.78		50.12	25.035	18.4639	26.25	5.929	3.805	3.706	0.099	3.7555	0.88	2.1735	1.36e-14
GAL16	53.76	25.83		60.5	28.1686	22.1445	21.39	5.882	3.882	3.662	0.22	3.772	0.52	2.11	4.49e-15
GAL18	49.86	25.95		64.94	26.3623	23.7219	10.02	5.817	3.917	3.58	0.337	3.7485	0.35	2.0685	1.63e-15
*cylinders (Volume=PI*radius^2*height)
After high-temperature deformation
Sample**	Sample length (mm)	Sample diameter - top (mm)	Sample diameter - centre (mm)	Sample mass (g)	Sample bulk volume (cm3)	Sample skeletal volume (cm3)	Connected Porosity (%)	Confining pressure (MPa)	Pore pressure in (MPa)	Pore pressure out (MPa)	Delta P pore pressure (MPa)	Average pore pressure (MPa)	Flow rate (mL/min)	Effective pressure (MPa)	Permeability (m2)
GAL4	48	26.64	31.327	62.34	33.4815	22.6241	32.43	5.803	3.526	3.47	0.056	3.498	2.07	2.305	5.3e-14
GAL5	48.69	26.48	27.905	74.16	28.917	27.2466	5.78	5.737	3.982	3.021	0.961	3.5015	0.08	2.2355	1.23e-16
GAL6	44.53	26.55	29.581	58.81	28.6505	21.6168	24.55	5.71	3.682	3.322	0.36	3.502	1.41	2.208	5.25e-15
GAL7	37.24	26.55	28.417	50.78	28.2144	18.7368	33.59	5.894	3.562	3.447	0.115	3.5045	1.95	2.3895	1.91e-14
GAL8	48.67	26.57	27.792	60.33	28.6583	22.2839	22.24	5.739	3.62	3.375	0.245	3.4975	1.66	2.2415	9.91e-15
GAL14	43.6	26.12	27.672	50.11	25.4223	18.487	27.28	5.915	4.017	3.989	0.028	4.003	2.13	1.912	1.03e-13
GAL16	48.93	26.19	27.242	60.48	27.9259	22.2824	20.21	6.046	4.024	3.976	0.048	4	2.09	2.046	6.59e-14
GAL18	45.52	26.46	28.078	64.93	27.2367	23.8041	12.6	6.053	4.117	3.88	0.237	3.9985	1.66	2.0545	9.66e-15
**barrels (Volume=(PI*height/3)*(topradius^2+2centreradius^2)
