# Supplementary material for: Micro-Textural Controls on Magma Rheology and Vulcanian Explosion Cyclicity
Source: Frontiers journal article supplement (doi:10.3389/feart.2020.611320), 2021-01-25
Supplement: Data_Sheet_3.xlsx [file Data_Sheet_3.xlsx]

## Sheet: Summary results
Supplementary File C: Textural results
Micro-textural controls on magma rheology and vulcanian explosion cyclicity
A. A. Bain, J. E. Kendrick, A. Lamur, Y. Lavallée, E. S. Calder, J. A. Cortés, G. P. Cortés, D. Gomez Martinez, R. A Torres
Plagioclase microlites
Sample	Area analysed (mm2)	No. crystals analysed	Vesicles+Microcracks area %	Glass area%	Feldspar area %	Reference area AR (mm2)	NA (mm-2)*	Mean crystal area (micron2)*	Phi*	S	I	L	R2 for S:I:L	S/L	ln(n0 (mm-4))	Smallest crystal measured (micron)	Nv (mm-3)	Lc (micron)	Klein* relative viscosity	Klein* Polydispersity	Klein* mean aspect ratio	Klein* max. packing fraction
GAL4	0.395421	1495	0.883577	46.6202	42.0374	0.391928	3814 (199)	93 (9)	0.474 (0.034)	1	1.8	8	0.781179	0.125	17.5845	0.958975	664571	15.3359	10.1031	0.187276	2.9346	0.691802		*Klein, J., Mueller, S.P., Helo, C., Schweitzer, S., Gurioli, L. and Castro, J.M., 2018. An expanded model and application of the combined effect of crystal-size distribution and crystal shape on the relative viscosity of magmas. Journal of Volcanology and Geothermal Research, 357, pp.128-133.
GAL5	0.409805	3315	1.20495	47.742	42.6947	0.404867	8188 (252)	44 (5)	0.472 (0.029)	1	1.25	2.1	0.8634	0.47619	21.5931	0.411301	5.28681e+06	2.21519	7.58947	0.101004	2.04108	0.74111
GAL6	0.28595	1091	5.32049	49.5168	39.3836	0.270736	4030 (231)	70 (1)	0.443 (0.031)	1	1.3	7	0.77425	0.142857	18.0122	0.80234	707361	10.6423	7.15113	0.161042	2.57455	0.707623
GAL7	0.208926	763	1.92863	57.5496	31.8217	0.204896	3724 (224)	76 (14)	0.356 (0.025)	1	1.5	7	0.851201	0.142857	17.6429	0.475486	570390	12.4157	4.23612	0.206189	2.67488	0.692546
GAL8	0.516235	1782	24.135	44.0525	18.5312	0.391642	4550 (265)	48 (7)	0.296 (0.043)	1	1.2	7	0.774419	0.142857	18.9435	0.323654	1.06962e+06	6.34146	2.87524	0.120681	2.57972	0.72175
GAL14	0.197607	830	1.01149	61.85	25.5878	0.195608	4243 (434)	50 (7)	0.293 (0.020)	1	1.6	3	0.795487	0.333333	20.3334	0.789375	2.29255e+06	3.38555	2.88323	0.161136	2.38014	0.711891
GAL16	0.281561	1143	4.39973	53.2144	28.5748	0.269173	4246 (304)	60 (5)	0.349 (0.029)	1	1.4	2.3	0.813995	0.434783	20.1421	0.800655	1.92803e+06	3.44767	3.80237	0.139741	2.46173	0.717144
GAL18	0.249	1550	4.39687	45.3364	41.4549	0.238052	6511 (337)	62 (6)	0.478 (0.030)	1	1.4	5.5	0.81406	0.181818	19.7462	0.146195	2.16189e+06	5.7431	9.03104	0.127919	2.72582	0.715843
*Standard deviation in brackets was calculated by dividing the stitched groundmass image into four halves (right, left, top, bottom) and performing image analysis on each half
**R2 value from CSDslice (Morgan and Jerram, 2006)
Phenocrysts
Mean of Method 1
Sample	Larger area	Smaller area	Mean
GAL4	62.0391	50.5444	56.2917
GAL5	54.1249	43.3473	48.7361
GAL6	69.9273	60.6107	65.269
GAL7	56.3649	40.9159	48.6404
GAL8	58.666	40.9838	49.8249
GAL14	57.7592	45.3633	51.5613
GAL16	56.875	50.4255	53.6502
GAL18	53.1459	53.1514	53.1487
Mean of Method 2
Sample	Larger area	Smaller area	Mean
GAL4	58.7048	52.7393	55.722
GAL5	45.8689	41.3766	43.6227
GAL6	59.4631	63.1952	61.3291
GAL7	58.8828	53.4508	56.1668
GAL8	57.9417	47.7789	52.8603
GAL14	60.9343	55.5734	58.2538
GAL16	59.8544	57.9917	58.923
GAL18	56.7978	55.5987	56.1983

## Sheet: Microlite batch variability
Supplementary File C: Textural results
Micro-textural controls on magma rheology and vulcanian explosion cyclicity
A. A. Bain, J. E. Kendrick, A. Lamur, Y. Lavallée, E. S. Calder, J. A. Cortés, G. P. Cortés, D. Gomez Martinez, R. A Torres
Plagioclase microlite batch variability
Standard deviation was calculated by dividing the stitched groundmass image into four halves (right, left, top, bottom) and performing image analysis on each half
Sample	Notes	Analysed area (mm^2)	Number of crystals not touching edge	Vesicles + microcracks area %	Glass area %	Feldspar area %	Reference area AR (mm^2)	Crystal number density NA (mm^-2)	Crystallinity Phi	Mean crystal area (um2)		Std Dev NA (mm^-2)	Std Dev Phi	Std Dev MCA (um2)
GAL4	RH half	0.213409	739	1.00183	43.7208	46.3148	0.211271	3497.87	0.467835	90.8163		199.424	0.0340009	8.90255
GAL5	RH half	0.239314	1863	0.775791	44.9899	45.8226	0.237457	7845.63	0.461808	50.0785		251.688	0.0292685	5.19753
GAL6	RH half	0.165321	560	7.492	46.111	40.5226	0.152936	3661.67	0.438044	66.4592		230.744	0.0310219	1.11021
GAL7	RH half	0.114826	427	1.9957	57.9527	31.7532	0.112534	3794.4	0.323998	79.1775		224.39	0.0248707	13.9925
GAL8	RH half	0.307539	1021	20.5914	42.5499	19.7764	0.244213	4180.78	0.249046	45.5102		265.07	0.0425865	6.58944
GAL14	RH half	0.0788722	391	0.797016	66.3669	23.377	0.0782436	4997.21	0.235648	31.7201		434.189	0.0196674	7.48073
GAL16	RH half	0.127223	432	10.6087	47.2782	30.7756	0.113726	3798.6	0.34428	56.2072		304.243	0.0291068	4.82423
GAL18	RH half	0.13263	779	3.28633	42.871	45.8736	0.128271	6073.08	0.474323	54.4099		336.685	0.0303354	6.22673
Sample	Notes	Analysed area (mm^2)	Number of crystals not touching edge	Vesicles + microcracks area %	Glass area %	Feldspar area %	Reference area AR (mm^2)	Crystal number density NA (mm^-2)	Crystallinity Phi	Mean crystal area (um2)
GAL4	LH half	0.193484	771	1.49365	48.6259	37.4171	0.190594	4045.25	0.379844	67.3432
GAL5	LH half	0.175778	1492	0.567839	52.9884	38.3207	0.17478	8536.46	0.385395	35.7383
GAL6	LH half	0.164617	689	2.22178	55.0801	36.8432	0.160959	4280.58	0.376804	68.2275
GAL7	LH half	0.0986133	330	2.4748	58.7632	29.4484	0.0961728	3431.32	0.301957	64.8387
GAL8	LH half	0.252385	876	29.5612	44.6928	18.4673	0.177777	4927.52	0.262175	45.913
GAL14	LH half	0.118156	451	1.60954	58.9128	27.2935	0.116254	3879.43	0.2774	51.7015
GAL16	LH half	0.174411	757	2.0086	57.4436	25.7496	0.170908	4429.29	0.262774	48.0164
GAL18	LH half	0.115504	750	6.1613	47.95	36.7052	0.108388	6919.59	0.391152	46.1803
Sample	Notes	Analysed area (mm^2)	Number of crystals not touching edge	Vesicles + microcracks area %	Glass area %	Feldspar area %	Reference area AR (mm^2)	Crystal number density NA (mm^-2)	Crystallinity Phi	Mean crystal area (um2)
GAL4	Top half	0.230199	872	0.831414	46.5386	43.7995	0.228285	3819.78	0.441667	71.419
GAL5	Top half	0.268884	2171	0.71543	48.2718	43.9483	0.26696	8132.29	0.44265	41.4619
GAL6	Top half	0.239249	887	5.87831	52.0903	35.6659	0.225186	3938.97	0.378934	65.1048
GAL7	Top half	0.149817	507	1.9306	55.8134	33.3381	0.146925	3450.75	0.339944	88.8102
GAL8	Top half	0.288789	1043	19.8826	46.6723	23.5148	0.23137	4507.93	0.293504	51.7619
GAL14	Top half	0.0933382	371	1.09767	61.6769	28.335	0.0923137	4018.91	0.286495	41.8208
GAL16	Top half	0.105445	443	7.72038	56.5894	27.5929	0.0973043	4552.73	0.299014	45.864
GAL18	Top half	0.140044	884	5.66764	46.7774	40.0846	0.132106	6691.57	0.424929	55.4056
Sample	Notes	Analysed area (mm^2)	Number of crystals not touching edge	Vesicles + microcracks area %	Glass area %	Feldspar area %	Reference area AR (mm^2)	Crystal number density NA (mm^-2)	Crystallinity Phi	Mean crystal area (um2)
GAL4	Bottom half	0.167564	610	1.24194	46.4889	39.7915	0.165483	3686.18	0.402919	78.3173
GAL5	Bottom half	0.225283	1797	0.819779	48.9468	40.7777	0.223436	8042.56	0.411147	44.6896
GAL6	Bottom half	0.181701	674	2.2314	48.917	43.1786	0.177647	3794.04	0.441641	66.4111
GAL7	Bottom half	0.0728672	279	3.1992	62.416	26.4954	0.070536	3955.43	0.27371	51.9924
GAL8	Bottom half	0.264508	835	29.9387	40.3445	12.4177	0.185318	4505.78	0.17724	33.6241
GAL14	Bottom half	0.116992	510	1.49585	60.7918	25.2562	0.115242	4425.46	0.256397	36.0659
GAL16	Bottom half	0.198142	761	4.47799	51.3081	28.042	0.189269	4020.73	0.293565	56.7149
GAL18	Bottom half	0.113138	683	3.51027	43.2579	43.0049	0.109166	6256.52	0.445694	63.7638

## Sheet: Phenocryst abundance
Supplementary File C: Textural results
Micro-textural controls on magma rheology and vulcanian explosion cyclicity
A. A. Bain, J. E. Kendrick, A. Lamur, Y. Lavallée, E. S. Calder, J. A. Cortés, G. P. Cortés, D. Gomez Martinez, R. A Torres
Phenocryst estimation
Method 1 on larger areas
Sample	Area analysed (mm2)	Plag+Px area %	Plag+Px mm2	Fe-Ti Oxides area %	Fe-Ti Ox mm2	Groundmass area %	Groundmass mm2	Vesicles area %	Vesicles mm2	Total mm2	All phenocrysts mm2	Analysed area minus vesicles (mm2)	Phenocrysts on vesicle free basis (area %)
GAL4	551.448	54.353	299.729	0.930733	5.13251	33.8274	186.541	10.8888	60.0463	551.448	304.861	491.402	62.0391
GAL5	433.186	49.7885	215.677	2.94213	12.7449	44.6933	193.605	2.57614	11.1595	433.186	228.421	422.026	54.1249
GAL6	461.513	58.1219	268.24	3.76624	17.3817	26.6154	122.834	11.4964	53.0573	461.513	285.622	408.456	69.9273
GAL7	410.408	47.2929	194.094	1.24585	5.11306	37.5765	154.217	13.8848	56.9845	410.408	199.207	353.424	56.3649
GAL8	557.439	47.3482	263.937	1.70381	9.49771	34.5603	192.653	16.3877	91.3513	557.439	273.435	466.088	58.666
GAL14	466.063	43.5871	203.143	0.88517	4.12545	32.5237	151.581	23.0041	107.214	466.063	207.269	358.849	57.7592
GAL16	476.301	47.1823	224.73	1.16088	5.52926	36.6558	174.592	15.001	71.4498	476.301	230.259	404.851	56.875
GAL18	500.501	48.9399	244.944	1.24422	6.22732	44.2429	221.436	5.57303	27.8931	500.501	251.172	472.608	53.1459
Method 2 on larger areas
Sample	Area analysed (mm2)	Fe-Ti Oxides area %	Plag+Px area %	Vesicles area %	Groundmass area %	Phenocrysts area %	Analysed area % without vesicles	Phenocrysts on vesicle free basis (area %)
GAL4	551.329	1.011	49.555	13.864	35.57	50.566	86.136	58.7048
GAL5	433.336	1.331	43.821	1.563	53.285	45.152	98.437	45.8689
GAL6	461.65	5.203	45.23	15.186	34.381	50.433	84.814	59.4631
GAL7	410.52	3.69	46.477	14.802	35.031	50.167	85.198	58.8828
GAL8	557.574	2.038	43.948	20.634	33.38	45.986	79.366	57.9417
GAL14	466.052	1.399	46.616	21.202	30.783	48.015	78.798	60.9343
GAL16	476.285	1.986	48.646	15.408	33.96	50.632	84.592	59.8544
GAL18	500.45	2.189	50.487	7.257	40.067	52.676	92.743	56.7978
Method 1 on smaller areas
Sample	Area analysed (mm2)	Plag+Px area %	Plag+Px mm2	Fe-Ti Oxides area %	Fe-Ti Ox mm2	Groundmass area %	Groundmass mm2	Vesicles area %	Vesicles mm2	Total mm2	All phenocrysts mm2	Analysed area minus vesicles (mm2)	Phenocrysts on vesicle free basis (area %)
GAL4	77.4225	45.335	35.0995	1.438	0.111334	44.4992	34.4524	10.022	7.75928	77.4225	35.2108	69.6632	50.5444
GAL5	95.6295	42.9	41.0251	3.125	0.298842	56.4765	54.0082	0.311	0.297408	95.6295	41.3239	95.3321	43.3473
GAL6	63.5637	53.726	34.1503	5.315	0.337841	35.2605	22.4129	10.482	6.66275	63.5637	34.4881	56.901	60.6107
GAL7	164.462	35.764	58.8183	3.611	0.593873	52.1659	85.7932	11.709	19.2569	164.462	59.4121	145.205	40.9159
GAL8	157.374	34.488	54.275	0.835	0.131407	49.7825	78.3446	15.646	24.6227	157.374	54.4065	132.751	40.9838
GAL14	146.044	36.521	53.3369	0.645	0.0941987	44.0645	64.3538	19.35	28.2596	146.044	53.4311	117.785	45.3633
GAL16	64.9849	43.878	28.5141	0.905	0.0588113	43.2265	28.0907	12.805	8.32131	64.9849	28.5729	56.6636	50.4255
GAL18	58.6665	49.964	29.3121	1.567	0.0919304	44.1773	25.9173	5.702	3.34516	58.6665	29.404	55.3213	53.1514
Method 2 on smaller areas
Sample	Area analysed (mm2)	Fe-Ti Oxides area %	Plag+Px area %	Vesicles area %	Groundmass area %	Phenocrysts area %	Analysed area % without vesicles	Phenocrysts on vesicle free basis (area %)
GAL4	77.4225	1.66	44.74	12.02	41.58	46.4	87.98	52.7393
GAL5	95.6295	3.12	38.24	0.04	58.6	41.36	99.96	41.3766
GAL6	63.5637	2.08	48.71	19.63	29.58	50.79	80.37	63.1952
GAL7	164.462	1.53	45.48	12.05	40.94	47.01	87.95	53.4508
GAL8	157.374	0.8	38.78	17.16	43.26	39.58	82.84	47.7789
GAL14	146.044	0.55	41.08	25.09	33.28	41.63	74.91	55.5734
GAL16	64.9849	0.97	46.56	18.04	34.43	47.53	81.96	57.9917
GAL18	58.6665	1.5	50.04	7.3	41.16	51.54	92.7	55.5987
Evaluation of the two methods
				Mean of Method 1
Sample	Method 1 large/small difference (%)	Method 2 large/small difference (%)		Sample	Larger area (%)	Smaller area (%)	Mean (%)
GAL4	11.4947	5.96558		GAL4	62.0391	50.5444	56.2917
GAL5	10.7776	4.49238		GAL5	54.1249	43.3473	48.7361
GAL6	9.31658	3.73216		GAL6	69.9273	60.6107	65.269
GAL7	15.4489	5.43201		GAL7	56.3649	40.9159	48.6404
GAL8	17.6821	10.1628		GAL8	58.666	40.9838	49.8249
GAL14	12.3959	5.36093		GAL14	57.7592	45.3633	51.5613
GAL16	6.4495	1.86266		GAL16	56.875	50.4255	53.6502
GAL18	0.00548478	1.19911		GAL18	53.1459	53.1514	53.1487
Sample	Large area difference between methods (%)	Small area difference between methods (%)		Mean of Method 2
GAL4	3.33425	2.1949		Sample	Larger area (%)	Smaller area (%)	Mean (%)
GAL5	8.256	1.97076		GAL4	58.7048	52.7393	55.722
GAL6	10.4642	2.58451		GAL5	45.8689	41.3766	43.6227
GAL7	2.51797	12.5349		GAL6	59.4631	63.1952	61.3291
GAL8	0.72429	6.79502		GAL7	58.8828	53.4508	56.1668
GAL14	3.17505	10.2101		GAL8	57.9417	47.7789	52.8603
GAL16	2.97938	7.56622		GAL14	60.9343	55.5734	58.2538
GAL18	3.65191	2.44731		GAL16	59.8544	57.9917	58.923
				GAL18	56.7978	55.5987	56.1983
