# Supplementary material for: Micro-Textural Controls on Magma Rheology and Vulcanian Explosion Cyclicity
Source: Frontiers journal article supplement (doi:10.3389/feart.2020.611320), 2021-01-25
Supplement: Data_Sheet_6.xlsx [file Data_Sheet_6.xlsx]

## Sheet: Sheet1
Supplementary File F: Glass analyses and viscosity calculations
Micro-textural controls on magma rheology and vulcanian explosion cyclicity
A. A. Bain, J. E. Kendrick, A. Lamur, Y. Lavallée, E. S. Calder, J. A. Cortés, G. P. Cortés, D. Gomez Martinez, R. A Torres
Glass analyses (wt%)														Melt viscosity results and relative viscosity calculations
Sample	Na2O	Al2O3	K2O	FeO	MgO	CaO	SiO2	P2O5	TiO2	MnO	Total	Calculated NBO/T (after Mysen & Richet 2019)		Sample	GAL4	GAL5	GAL6	GAL7	GAL8	GAL14	GAL16	GAL18
GAL4	3.4124	12.231	5.6258	2.0702	0.0941	0.3892	75.6792	0.0978	0.7346	0.0286	100.363	0.0385282		Log(Apparent viscosity (Pa.s)) (measured data)
GAL4	3.1652	11.7043	5.4195	1.8265	0.0896	0.4649	75.8317	0.112	0.8145	0.041	99.4691	0.0356258		at strain rate=10^(-6)	12.0941	11.077	11.8896	11.6881	10.777	10.9703	10.7492	11.4704
GAL4	3.0566	12.3683	5.4673	1.7963	0.0813	0.3351	75.4806	0.1125	0.6588	0.0195	99.3763	0.0210455		at strain rate=10^(-5)	11.6557	11.0262	11.3735	11.4074	10.5279	10.589	10.4272	11.094
GAL4	3.1143	11.9333	5.4842	1.0312	0.0353	0.2783	76.9452	0.1158	0.6016	0.0175	99.5567	0.0134615		at strain rate=10^(-4)	11.06	10.7663	10.9057	10.9925	10.3063	10.3827	10.2046	10.8014
GAL4	3.3917	11.7445	5.5669	1.8676	0.0645	0.3142	75.8307	0.1064	0.8224	0.0344	99.7434	0.0380712		Log(Melt viscosity (Pa.s)), Giordano et al. 2008* model at 940°C										*Giordano, D., Russell, J.K. and Dingwell, D.B., 2008. Viscosity of magmatic liquids: a model. Earth and Planetary Science Letters, 271(1-4), pp.123-134.
GAL4	3.1018	12.0398	5.3195	1.5941	0.0141	0.2878	76.2527	0.0818	0.7746	0.0264	99.4925	0.0175386		0 wt% H2O	8.42017	8.43414	8.36527	8.30933	8.18458	8.23539	8.12606	8.46634
GAL4	3.5033	11.8595	5.5889	1.7214	0.043	0.8028	74.9575	0.2901	0.753	0.0319	99.5514	0.0499103		0.36 wt%H2O	7.26827	7.29381	7.22859	7.17368	7.05745	7.10132	6.99932	7.31974
GAL4	3.4862	11.7242	5.5976	1.8778	0.0956	0.3799	75.7508	0.1103	0.7706	0.0301	99.8232	0.0435491		Log(Relative viscosity (Pa.s))
														at strain rate=10^(-6):
GAL5	3.5009	11.0486	4.9446	1.6429	0.079	0.7893	77.5923	0.3229	0.5526	0.0241	100.497	0.0502993		0 wt% H2O	3.67392	2.64287	3.52435	3.37873	2.5924	2.7349	2.62318	3.0041
GAL5	3.4772	11.2239	4.9834	1.7544	0.1011	0.4579	78.1974	0.0812	0.5467	0.0225	100.846	0.0401939		0.36 wt%H2O	4.82582	3.78319	4.66103	4.51438	3.71954	3.86896	3.74992	4.1507
GAL5	3.4529	11.2086	4.9633	1.6414	0.1427	0.4474	78.4851	0.0808	0.5372	0.035	100.994	0.0391147		at strain rate=10^(-5):
GAL5	3.5423	11.1138	5.1149	1.6503	0.1221	0.4103	78.0677	0.0437	0.5184	0.0286	100.612	0.0427128		0 wt% H2O	3.23553	2.59207	3.00825	3.09803	2.34331	2.3536	2.30113	2.62768
GAL5	3.545	11.3935	5.1983	1.4829	0.1172	0.3827	77.3342	0.041	0.5482	0.0271	100.07	0.037104		0.36 wt%H2O	4.38743	3.7324	4.14493	4.23368	3.47044	3.48767	3.42787	3.77428
GAL5	3.4955	11.093	5.0107	1.772	0.1083	0.4313	77.1789	0.0329	0.5388	0.0222	99.6836	0.0426273		at strain rate=10^(-4):
GAL5	3.5154	11.3374	4.9542	1.7208	0.1295	0.4458	77.4403	0.0501	0.5438	0.0263	100.163	0.0393351		0 wt% H2O	2.63985	2.33216	2.54038	2.68314	2.12175	2.14728	2.07849	2.3351
GAL5	3.416	11.2053	5.0114	1.7459	0.0736	0.3884	77.5056	0.0317	0.5578	0.0243	99.9599	0.0367714		0.36 wt%H2O	3.79175	3.47248	3.67706	3.81879	3.24888	3.28134	3.20524	3.4817
GAL6	3.7695	11.38	5.0169	1.7439	0.1559	0.3532	76.8146	0.06	0.6174	0.0321	99.9434	0.0445394
GAL6	3.6648	11.7825	5.0188	1.4397	0.133	0.4324	76.7703	0.0652	0.5804	0.0442	99.9312	0.0337103
GAL6	3.6374	11.4859	5.092	2.4152	0.1272	0.3767	77.02	0.0667	0.6379	0.0296	100.889	0.051069
GAL6	3.5815	11.6173	5.0201	1.6604	0.1029	0.3909	76.5874	0.0603	0.623	0.0312	99.675	0.035338
GAL6	3.5477	11.5999	4.9946	1.1636	0.1112	0.363	77.2535	0.0665	0.6134	0.0212	99.7346	0.026203
GAL6	3.753	11.946	5.3679	1.6249	0.1053	0.343	76.9058	0.0595	0.5958	0.0208	100.722	0.0375378
GAL6	3.5299	11.4132	5.17	1.5399	0.1353	0.3067	76.9486	0.0564	0.6175	0.0208	99.7383	0.0359507
GAL7	3.4417	11.9321	5.2763	1.6444	0.0668	0.284	76.8603	0.0598	0.6255	0.0356	100.227	0.0278063
GAL7	3.4854	11.8265	5.3205	1.7917	0.0771	0.3523	77.2868	0.0611	0.6747	0.0317	100.908	0.034681
GAL7	5.5565	14.4263	3.9643	1.3173	0.0361	1.1238	73.7979	0.0293	0.5434	0.0283	100.823	0.0355625
GAL7	3.4011	11.7043	5.1048	1.8256	0.1119	0.3341	76.2429	0.0608	0.6753	0.0397	99.5005	0.0332674
GAL7	3.6584	11.7164	5.1734	2.1181	0.109	0.3075	76.939	0.0549	0.6777	0.0325	100.787	0.0427932
GAL7	3.7037	11.5297	5.1954	1.8263	0.0535	0.3046	76.4533	0.0467	0.6287	0.0296	99.7717	0.0403662
GAL7	3.5324	11.7349	5.2499	1.5744	0.0598	0.2273	76.1041	0.0388	0.6419	0.0302	99.1936	0.0293047
GAL7	3.6691	11.584	5.2166	2.0208	0.0688	0.2529	76.3879	0.0623	0.6312	0.0341	99.9277	0.0416977
GAL7	3.7085	11.9519	5.2711	1.4899	0.0792	0.257	76.8459	0.0503	0.621	0.0341	100.309	0.0304425
GAL8	3.7463	12.2707	4.8592	2.149	0.1597	0.7192	76.2756	0.073	0.6171	0.046	100.916	0.0453349
GAL8	3.8756	11.7475	4.9581	2.5538	0.157	0.7196	75.7011	0.0946	0.585	0.0268	100.419	0.0629149
GAL8	3.9666	12.0924	4.8861	2.2643	0.1843	0.7704	75.9424	0.0818	0.6093	0.0517	100.849	0.0569495
GAL8	3.8208	12.2167	4.7509	2.2516	0.1347	0.7245	75.4171	0.0912	0.6062	0.0438	100.058	0.0475673
GAL8	3.7143	12.2114	4.882	2.0099	0.1789	0.6193	75.4878	0.0779	0.5977	0.0379	99.817	0.042211
GAL8	3.8474	12.072	4.7725	2.1291	0.1468	0.7727	75.1903	0.0669	0.5958	0.0514	99.6449	0.0501388
GAL8	3.9897	11.9776	4.7927	2.3292	0.1569	0.7419	75.7376	0.0886	0.6181	0.0494	100.482	0.0572653
GAL8	3.9471	12.2525	5.0401	1.621	0.1043	0.5449	75.6977	0.1522	0.6112	0.0321	100.003	0.0391576
GAL8	3.8977	11.9428	4.8039	2.256	0.1823	0.6991	74.7555	0.0713	0.6173	0.0437	99.2697	0.0549731
GAL14	3.6137	11.8024	4.9166	2.3697	0.2301	0.7742	74.7853	0.0681	0.6164	0.0522	99.2288	0.0576446
GAL14	3.8214	12.2044	4.7429	2.2483	0.102	0.5338	75.6147	0.0682	0.5685	0.0233	99.9275	0.0413277
GAL14	3.7379	12.0977	4.9637	2.1706	0.1564	0.8143	75.8601	0.0674	0.581	0.0402	100.489	0.0514987
GAL14	3.7979	12.1175	4.8825	2.0559	0.1718	0.6799	75.0528	0.064	0.5838	0.0438	99.4498	0.0474106
GAL14	3.7918	12.4989	4.9766	2.3036	0.1973	0.4112	75.7543	0.068	0.5428	0.0349	100.579	0.0412395
GAL14	3.6061	12.0892	4.6851	2.4344	0.1779	0.6753	75.811	0.0705	0.5938	0.0434	100.187	0.0464476
GAL14	3.5515	11.6544	4.6762	2.1856	0.1401	0.6032	76.1133	0.0824	0.5946	0.0396	99.6409	0.0441949
GAL14	3.7092	12.2453	4.7308	2.1001	0.1184	0.769	75.2638	0.0767	0.5184	0.0411	99.5729	0.0426261
GAL16	3.9194	12.4445	4.7493	2.3972	0.1479	0.69	75.2263	0.0901	0.6294	0.0429	100.337	0.0484606
GAL16	4.1014	12.5696	4.6517	2.3562	0.1439	0.6493	75.5954	0.0795	0.6355	0.0473	100.83	0.0473484
GAL16	3.9584	12.3781	4.7151	2.6114	0.1885	0.8056	75.0797	0.1044	0.634	0.0692	100.544	0.0577748
GAL16	3.8686	12.1765	4.6487	2.4332	0.2342	0.7864	74.7038	0.0988	0.6279	0.038	99.616	0.0556088
GAL16	3.8347	12.4641	4.6986	2.387	0.207	0.833	75.2097	0.0983	0.6264	0.0483	100.407	0.0510196
GAL16	3.9479	12.1753	4.7367	2.4078	0.219	0.7882	75.2273	0.0948	0.6479	0.0543	100.299	0.0576594
GAL16	3.7904	12.2939	4.744	2.3204	0.2191	0.7642	74.1168	0.0936	0.6176	0.0513	99.0113	0.0514291
GAL16	4.0701	12.6376	4.6589	2.4944	0.2007	0.8531	74.9493	0.1003	0.6301	0.0331	100.628	0.0549141
GAL18	3.6977	11.9208	5.0618	1.3137	0.0156	0.267	78.0631	0.0648	0.5398	0.0073	100.952	0.0225499
GAL18	3.4955	11.6937	5.2646	1.8498	0.0638	0.2127	77.7715	0.0723	0.5135	0.0278	100.965	0.0329665
GAL18	3.5324	11.6122	5.1753	1.2433	0.0466	0.2358	77.1699	0.0831	0.6137	0.0182	99.7304	0.0244789
GAL18	3.6362	11.8284	5.1457	1.2962	0.03	0.2244	77.5512	0.0773	0.5941	0.0183	100.402	0.0232674
GAL18	3.5951	11.9199	5.0539	1.1274	0.0214	0.2162	77.5905	0.0551	0.6089	0.0082	100.197	0.0165314
GAL18	3.6347	11.7215	5.3508	1.6174	0.0077	0.2354	77.4108	0.06	0.6167	0.0197	100.675	0.0317741
GAL18	3.5508	11.9113	5.1967	1.4167	-0.0005	0.2332	77.3815	0.0636	0.4962	0.013	100.262	0.021964
GAL18	3.4729	11.4302	5.2198	1.202	0.0008	0.2064	78.0436	0.0742	0.6523	0.0304	100.333	0.023345
