# Supplementary material for: Micro-Textural Controls on Magma Rheology and Vulcanian Explosion Cyclicity
Source: Frontiers journal article supplement (doi:10.3389/feart.2020.611320), 2021-01-25
Supplement: Data_Sheet_7.xlsx [file Data_Sheet_7.xlsx]

## Sheet: Modelling results
Supplementary File G: Viscosity modelling results
Micro-textural controls on magma rheology and vulcanian explosion cyclicity
A. A. Bain, J. E. Kendrick, A. Lamur, Y. Lavallée, E. S. Calder, J. A. Cortés, G. P. Cortés, D. Gomez Martinez, R. A Torres
Ostwald & non-Newtonian constants							Viscosity modelling results for time-constrained samples
Sample	ln(n0 (mm-4))	n	k (Pa.s^n)				Sample	AB5b	AB8	AB9	AB14	AB15	AB18	AB21
GAL4	17.58	0.43	1.77245e+09				Eruption date	21 Nov. 2004	2006-07-12	2006-07-12	17 Jan. 2008	17 Jan. 2008	20 Feb. 2009	2 Jan. 2010
GAL5	21.59	0.77	2.20534e+10				Log(Modelled apparent viscosity (Pa.s))
GAL6	18.01	0.55	3.89495e+09				at strain rate = 10^(-6)	12.1589	12.1911	12.2399	12.0079	11.7581	11.3949	11.3566
GAL7	17.64	0.6	7.72913e+09				at strain rate = 10^(-5)	11.7689	11.7882	11.777	11.6657	11.4797	11.1981	11.168
GAL8	18.94	0.8	1.01e+10				at strain rate = 10^(-4)	11.379	11.3853	11.3142	11.3236	11.2014	11.0013	10.9794
GAL14	20.33	0.81	1.43139e+10				Log(Melt viscosity (Pa.s)), Giordano et al. 2008 model at 940°C
GAL16	20.14	0.78	6.68613e+09				with volatiles	6.92484	7.65281	7.63321	7.9202	7.65598	7.2547	7.90051
GAL18	19.75	0.72	1.47514e+10				no volatiles	8.17887	8.22681	8.16584	8.5045	8.39471	8.32589	8.47481
							Log(Relative viscosity (Pa.s))
							with volatiles:
							at strain rate = 10^(-6)	1.29091	1.2288	1.23232	1.20109	1.21079	1.22785	1.17556
							at strain rate = 10^(-5)	1.27407	1.21229	1.21335	1.18712	1.19902	1.21906	1.16746
							at strain rate = 10^(-4)	1.25665	1.1952	1.19363	1.17274	1.18696	1.21011	1.15922
							no volatiles:
							at strain rate = 10^(-6)	1.18867	1.18663	1.19274	1.16116	1.15837	1.14806	1.13696
							at strain rate = 10^(-5)	1.17316	1.17068	1.17438	1.14765	1.14711	1.13984	1.12912
							at strain rate = 10^(-4)	1.15713	1.15418	1.15529	1.13374	1.13557	1.13148	1.12116

## Sheet: Error on viscosity model
Supplementary File G: Viscosity modelling results
Micro-textural controls on magma rheology and vulcanian explosion cyclicity
A. A. Bain, J. E. Kendrick, A. Lamur, Y. Lavallée, E. S. Calder, J. A. Cortés, G. P. Cortés, D. Gomez Martinez, R. A Torres
Accounting for RMSE on equations 3 and 4 in the viscosity model
Sample	ln(n0 (mm-4))	n	k	positive error on n	negative error on n	positive error on k	negative error on k	Modelled app. visc. at 10-6	Modelled app. visc. at 10-5	Modelled app. visc. at 10-4	Lower stress limit at 10-6	Lowest App. Viscosity at 10-6 (pa.s)	Lower stress limit at 10-5	Lowest App. Viscosity at 10-5 (Pa.s)	Lower stress limit at 10-6	Lowest App. Viscosity at 10-4 (Pa.s)	Higher stress limit at 10-6	Highest App. Viscosity at 10-6 (pa.s)	Higher stress limit at 10-5	Highest App. Viscosity at 10-5 (pa.s)	Higher stress limit at 10-4	Highest App. Viscosity at 10-4 (pa.s)
AB5b	18.3334	0.610036	6593467890	0.701036	0.519036	10349467890	2837467890	1440000000000	587000000000	239000000000	176488	176000000000	886648	88700000000	4.45438e+06	44500000000	7.95613e+06	7960000000000	26286821	2630000000000	8.68508e+07	869000000000
AB8	18.165	0.597089	5937877000	0.688088	0.506089	9693877000	2181877000	1550000000000	614000000000	243000000000	162293	162000000000	791385	79100000000	3.85901e+06	38600000000	8.91182e+06	8910000000000	2.85795e+07	2860000000000	9.16523e+07	917000000000
AB9	17.3853	0.537132	2902013062	0.628132	0.446132	6658013062	-8.53987e+08	1740000000000	598000000000	206000000000	-1.79746e+06	-1800000000000	-5.021e+06	-502000000000	-1.40256e+07	-140000000000	1.40137e+07	14000000000000	3.91457e+07	3910000000000	1.09349e+08	1090000000000
AB14	18.9549	0.65783	9013482541	0.74883	0.56683	12769482541	5257482541	1020000000000	463000000000	211000000000	168966	169000000000	947609	94800000000	5.31446e+06	53100000000	5.07219e+06	5070000000000	1.87079e+07	1870000000000	6.90009e+07	690000000000
AB15	19.7847	0.721644	12244674595	0.812644	0.630644	16000674595	8488674595	573000000000	302000000000	159000000000	112974	113000000000	733874	73400000000	4.76722e+06	47700000000	2.63194e+06	2630000000000	1.1244e+07	1120000000000	4.80357e+07	480000000000
AB18	20.8453	0.803206	16374531975	0.894206	0.712206	20130531975	12618531975	248000000000	158000000000	100000000000	54422.1	54400000000	426561	42700000000	3.34339e+06	33400000000	1.07305e+06	1070000000000	5.5313e+06	553000000000	2.85123e+07	285000000000
AB21	20.9521	0.811418	16790374396	0.902418	0.720418	20546374396	13034374396	227000000000	147000000000	95400000000	50185.8	50200000000	400866	40100000000	3.20197e+06	32000000000	977746	978000000000	5.13623e+06	514000000000	2.69813e+07	270000000000
											*Shaded boxes indicate where error quantification not possible due to negative error on k being greater than the modelled value of k, giving negative values of stress
							Legend:
							Black circles	Modelled data at each strain rate (sizes of symbols as in the manuscript)
							Grey squares	Upper limit of estimated error on modelled viscosity data
							Open squares	Lower limit of estimated error on modelled viscosity data
